1 **TITLE:** Toxic effect of 2,2'-bis(bicyclo[2.2.1] heptane) on bacterial cells.

2

3 **AUTHORS:** Kessenikh A. G.<sup>1</sup>, Gnuchikh E. Yu.<sup>1,2</sup>, Bazhenov S. V.<sup>1</sup>, Bermeshev M. V.<sup>3</sup>,  
4 Pevgov V. G.<sup>1</sup>, Samoilov V. O.<sup>3</sup>, Shorunov S. V.<sup>3</sup>, Maksimov A. L. <sup>3</sup>, Yaguzhinsky, L. S.<sup>1,4</sup>,  
5 Manukhov I. V.<sup>1,2,\*</sup>

6

7 <sup>1</sup>Moscow Institute of Physics and Technology. Dolgoprudny, Moscow oblast, 141700, Russia. e-mail:  
8 [manukhovi@mail.ru](mailto:manukhovi@mail.ru)

9 <sup>2</sup>State Research Institute of Genetics and Selection of Industrial Microorganisms of the National Research  
10 Center "Kurchatov Institute", Moscow, 117545, Russia.

11 <sup>3</sup>Topchiev Institute of Petrochemical Synthesis. Russian Academy of Sciences, Moscow, 119991, Russia

12 <sup>4</sup>Moscow MV Lomonosov State Univ, AN Belozersky Res Inst Physicochem Biol, Moscow, Russia

13 **KEYWORDS:** biosensor, luciferase, bioluminescence, inducible promoter, *PrecA*, *PkatG*,  
14 rocket fuel

15

16 **ABBREVIATIONS:** RLU: relative light units, BBH: 2,2'-bis(bicyclo[2.2.1]heptane), UDMH:  
17 unsymmetrical dimethylhydrazine, MNNG: N-methyl-N'-nitro-N-nitrosoguanidine.

18

## 19 **ABSTRACT**

20 Here we present the study of the genotoxic effect of a 2,2'-bis(bicyclo[2.2.1]heptane)  
21 (BBH), which is promising as a fuel component for liquid rocket engines. The use of *Escherichia*  
22 *coli lux*-biosensors showed that in addition to DNA damage causing SOS-response, there is also  
23 an oxidative effect on cells. The greatest toxicity is determined by the mechanism of formation  
24 of superoxide anion radical and is detected by the lux biosensor *E. coli* pSoxS-lux, in which the  
25 genes of bacterial luciferases are transcriptionally crosslinked with the promoter of the *soxS*  
26 gene. It is assumed that the oxidation of BBH leads to the formation of reactive oxygen species,  
27 which should give the main contribution to the toxicity of this substance.

## 28 **INTRODUCTION**

29 Norbornane and its non-saturated derivatives are commonly used in the production of  
30 rubber, epoxides, medicinal compounds and perfumes [1, 2]. Notably, thermotechnical  
31 characteristics of other strained hydrocarbons made them attractive for high-performance  
32 combustion applications. Strained 2,2'-bis(bicyclo[2.2.1]heptane) (BBH) compound is a  
33 promising as a fuel component for liquid rocket engines. It is assumed that BBH is comparable

34 with the unsymmetrical dimethylhydrazine (UDMH) in terms of specific impulse efficiency, but  
35 can be significantly less toxic to the environment and personnel working with rocketry. For the  
36 purpose of this study, BBH which consists of two strained structures made of 14 carbons and 22  
37 hydrogens (Fig. 1), was synthesized from 5-vynil-2-norborene [3-5]. Here we present the data  
38 describing toxicity of BBH, which we had obtained by utilizing bacterial *lux*-biosensors.

39  
40 *Lux*-biosensors are living *Escherichia coli* cells transformed with hybrid plasmids,  
41 containing *luxCDABE* genes of *Photobacterium luminescense* placed under control of various  
42 stress-responsive promoters, responsible for increasing the cells luminescence in occurrence of  
43 toxicants in the environment [6-9]. Similarly designed study of UDMH toxicity has been  
44 completed earlier [13, 14].

45 In this study, the genotoxicity of BBH was evaluated using specific *lux*-biosensors of  
46 *E. coli* MG1655 cells with hybrid plasmids pAlkA-*lux*, pOxyS-*lux*, pSoxS-*lux* and pColD-*lux*,  
47 reacting to DNA alkylation, oxidative damage by hydrogen peroxide, superoxide anion radicals  
48 and DNA damages that cause an SOS response, respectively. Were compared of threshold  
49 concentrations effect of BBH and UDMH on different stress-responsive promoters.

## 50 MATERIALS AND METHODS

### 51 Bacterial strains and plasmids

52 The cells of *Escherichia coli* K12 strain MG1655 F<sup>-</sup> *ilvG rfb-50 rph-1* were combined  
53 with plasmids pAlkA-*lux*, pColD-*lux*, pOxyR-*lux* and pSoxS-*lux* [8-12] that were built using a  
54 promoterless plasmid backbone pDW201 [7]. *E. coli* MG1655 cells transformed with pXen7  
55 plasmid constitutively expressing *luxCDABE* genes [15] were employed as non-inducible  
56 control.

### 57 Media and Culturing conditions

58 The cells of *E. coli* were grown at 30°C in LB broth supplemented with ampicillin (100  
59 µg/ml), in aerated conditions until early exponential phase.

### 60 Measurement of the intensity of bioluminescence

61 Cell were prepared by overnight cultivation at 30°C with aeration at 200 rpm in LB  
62 media, then diluted 1:100 in LB media, grown till reaching  $OD_{600} = 0.1-0.2$ , which corresponds  
63 to early/mid-logarithmic phase. These cells were sampled into the 200-µl subcultures in separate  
64 tubes, then 10 µl of tested compound (BBH or control) were added. Cells were grown without  
65 shaking at ~30°C, with repetitive direct measurements of total bioluminescence (in RLU, relative  
66 light units) using “Biotox-7” (LLC EKON, Russia) or plate luminometer LM-01A  
67 (Immunotech). Visible enhancement of bioluminescence had been detected in 15-20 minutes of

68 incubation, which roughly corresponds to the time necessary for biosynthesis of luciferase.  
69 Maxima of bioluminescence were observed after 40-60 minutes of exposure for all plasmids  
70 except one with the promoter P<sub>colD</sub>. In case of latter construct, maximum bioluminescence was  
71 detected in 90 minutes post exposure. The magnitude of the response was 50-100 times and was  
72 dependent on concentration of toxic agent. Each experiment has been performed in biological  
73 triplicates, with each triplicate independently measured five times.

#### 74 **Chemical.**

75 All chemicals were of analytical purity. Hydrogen peroxide was obtained from the firm  
76 "Ferraine". Mitomycin C, N, N' - dimethyl-4,4' - dipyridyl dichloride (paraquat), methyl  
77 methanesulfonate obtained from Sigma Chemical Co. All test solutions were prepared  
78 immediately before use. The investigated compound 2,2' - bis (bicyclo[2.2.1]heptane was  
79 synthesized by the Diels-alder reaction from 5-vinyl-2-norbornene and Dicyclopentadiene  
80 according to [16] with the subsequent stage of exhaustive hydrogenation of the cycloadduct in  
81 methanol on a Pd/C catalyst (1%) with hydrogen (25°C, 20 ATM, 24 h) [1, 5].

82

#### 83 **RESULTS**

84 At the first stage, the ability of BBH to alkylate DNA was investigated. To do this, *E. coli*  
85 MG1655 cells transformed by pAlkA-lux plasmid were grown to DO=0.1, then they were added  
86 to different concentrations of BBH. The mixtures were incubated at room temperature without  
87 aeration for 3 hours with periodic luminescence measurement. Figure 2 shows the luminescence  
88 kinetics of *E. coli* MG1655 (pAlkA-lux), after the addition of BBH. The pAlkA-lux plasmid  
89 contains *lux* genes under the control of the Alka gene promoter, therefore when alkylating agents  
90 occur in the sample the luminescent response increases. Dilutions of the alkylating substance  
91 methyl methanesulfonate (MMS) were used as a positive control.

92

93 As can be seen from the data shown in figure 2, none of the tested concentrations of BBH  
94 does not cause an alkylating effect (luminescence of the Alka-lux biosensor does not increase).  
95 At a maximum concentration of 100 g/l (10%) BBH has a cytotoxic effect, causing a slight  
96 decrease in the background luminescence of cells (about 2-3 times).

97 Figure 3 shows the measurement of the luminescence kinetics of *E. coli* MG1655  
98 containing pOxyR-lux plasmid, after the addition of BBH. Hydrogen peroxide was used as a  
99 positive control. The cells were incubated at room temperature for 2 hours with periodic  
100 luminescence measurement.

101

102

103

104

105

106

107

108

109

110

As can be seen from the data presented in the figure 3 there is oxidative stress caused by hydrogen peroxide. This type of cell damage can lead to modifications of DNA nitrogenous bases, leading to an increase in the rate of mutagenesis. The maximum effect is achieved at a concentration of BBH corresponding to 1% content in water (fig. 3, curve BBH-2), a lower concentration does not cause a significant increase in luminescence, and a higher has a General toxic effect on cells, leading to a decrease in the base level of luminescence.

111

112

113

114

115

116

Figure 4 shows the measurement of luminescence kinetics of *E. coli* MG1655 with pCold-lux plasmid, after the addition of BBH. As a positive control, were used the antibiotic mitomycin C, which forms crosslinking with DNA. As a result, there is a stop of the replication fork, the formation of single-stranded DNA sites and, as a consequence, SOS response. The cells were incubated at room temperature without aeration for 5 hours with periodic luminescence measurement.

117

118

119

120

121

122

123

As can be seen from the data shown in the figure, the addition of BBH in concentrations of 10% and 1% leads to a high level of DNA damage, which causes an SOS response. The maximum possible response amplitude of an *E. coli* biosensor (pCold-lux) is about three orders of magnitude [8]. In this experiment, we see the maximum activation of the biosensor about 20 times when incubated with BBH at a concentration of 10g/l.

124

125

126

127

128

129

130

131

132

133

Then it was investigated the appearance of a superoxide anion radical in cells during incubation in the presence of BBH. For these purposes, *lux* genes under the control of the Psox promoter were used. Figure 5 shows the luminescence kinetics of *E. coli* MG1655 pSoxS-lux cells incubated with BBH at room temperature without aeration for 4 hours. As a standard inductor for a Psox promoter is usually used paraquat – a substance that, when ingested, leads to occurrence of superoxide anion radical as a result of reactions with quinones of the respiratory chain. Hydrogen peroxide does not directly react with the SoxR protein, but causes lipid peroxidation and oxidation of a number of proteins, which in turn disrupts the respiratory chain, which eventually leads to increase in the superoxide anion radical pool in the cell [8, 17]. Thus, H<sub>2</sub>O<sub>2</sub> can also be used as a positive control to *E. coli* MG1655 pSoxS-lux..

134

135

136

137 As can be seen from figure 5, activation of the PsoxS promoter occurs when BBH is  
138 added at all concentrations from 1 to 100 g/l. On the basis of the data obtained in the experiments  
139 we can suggest that BBH causes the appearance of a superoxide anion radical in the cell.

140 Table 1 shows the threshold values of activation of stress promoters when UDMH and  
141 BBH appear in the medium. As "control" data are given for standard, promoter-specific toxicants  
142 inducing a noticeable (1.5-2 times) effect of bioluminescence enhancement of lux-biosensors.  
143 Mitomycin C induces damage in DNA, hydrogen peroxide causes the oxidative stress, paraquat  
144 used as a generator of superoxide ion radicals which induce oxidative stress,  
145 methylnitrosoguanidine (N-methyl-N'-nitro-N-nitrosoguanidine) (MNNG) alkylates DNA.

146

147

## 148 **DISCUSSION**

149 It is known that as a result of oxidation of a number of hydrocarbon compounds by bacterial  
150 cells, oxidative stress occurs [21, 22].

151 According to the literature, BBH must be oxidized by oxygen, as well as all hydrocarbons by a  
152 free-radical chain mechanism [23]. In the same work it is shown that under intense light one of  
153 the products of strained compounds destruction is hydroxyl radical, this is shown by the example  
154 of cyclopropane. The BBH molecule includes two elements with strained bonds, which  
155 determine a higher energy release in the oxidation process compared to conventional non-  
156 strained hydrocarbons. Comparison of  $\Delta H^\ddagger$  (in Kcal/mol) obtained for ring opening of  
157 cycloalkanes [24] shows that the ring strain energy is 3.57 times higher in cycloalkanes  
158 compared to cyclopentane. The radical mechanism of oxidation along with the increased reaction  
159 energy suggests that the toxic effect of this type of compounds should be determined mainly by  
160 reactions of formation of reactive oxygen species. In this regard, it should be noted that  
161 according to our experiment, the toxicity of BBH, determined by the appearance of a superoxide  
162 anion radical in cells, is close to that of UDMH, despite the fact that the tests were conducted  
163 with an undispersed form of the product insoluble in water, whose contacts with biological  
164 objects are sharply reduced and are determined only by the interface of the phases. Under natural  
165 conditions, deep dispersion of products is completely absent during fuel spillage, including in a

166 humid environment. Thus, the chosen experimental conditions achieve convergence with the  
167 conditions of accidental fuel spill.

168 The genotoxic effect of BBH definitely takes place and is expressed by cell damages that  
169 activates the following defense systems: SOS response, oxyRS regulon, and soxRS regulon.  
170 Activation of SOS response occurs only at very high concentrations of BBH in the medium  
171 (threshold concentration is about 1 g / l). The test using *E. coli* MG1655 pColD-lux is more  
172 sensitive to genotoxic agents than SOS chromotest [25], which is used in toxicology along with  
173 the Ames test [26, 27] to determine the rate of mutagenesis. These tests correlate well with each  
174 other [28], but may underestimate the effect of alkylating compounds on the rate of mutagenesis  
175 [29]. In the present work, using the *E. coli* MG1655 pAlkA-lux biosensor, it was shown that  
176 during incubation of cells with BBH, DNA alkylation is not observed and, obviously, alkylating  
177 compounds do not appear in the medium. We can proposed that the oxidation of BBH in the  
178 medium in the presence of *E. coli* cells leads to the appearance of alkyl radicals or alkyl  
179 hydroperoxides, which can lead to DNA damages. Thus, the mechanism of genotoxic action of  
180 BBH is fundamentally different from the action of UDMH, which is determined by alkylating  
181 derivatives, primarily nitrosodimethylamine [14] and superoxide-anion radicals arising from the  
182 oxidation of UDMH with atmospheric oxygen [13].

183

## 184 **ACKNOWLEDGMENTS**

185 The authors are grateful to Stanislav Filippovich Chalkin for the development of interdisciplinary ties in the  
186 scientific community.

187

## 188 **REFERENCES**

- 189 1. Bermeshev MV, Chapala PP. Addition polymerization of functionalized  
190 norbornenes as a powerful tool for assembling molecular moieties of new  
191 polymers with versatile properties. *Prog. Polym. Sci.*, 2018; 84:1-46.
- 192 2. Ivin KJ, Mol JC, Applications of the Olefin Metathesis Reaction. In *Olefin*  
193 *Metathesis and Metathesis Polymerization*. Academic Press: London, Eds. 1997;  
194 397-410.
- 195 3. Bermeshev MV, Antonova TN, Shangareev DR, Danilova AS, Pozharskaya NA.  
196 Selective Catalytic Hydrogenation of Alicyclic Dienes with Hydrogen in a Liquid  
197 Phase. *Pet. Chem.* 2018, 58(10):869-875.
- 198 4. Ushakov NV. Selective Hydrogenation of 5-Vinylnorborn-2-ene and Other  
199 Methods for the Synthesis of 2-Vinylnorbornane. *Appl. Chem.* 2018, 91 (5): 728-  
200 745.



- 201 5. Shorunov SV.; Piskunova, ES.; Petrov VA; Bykov VI; Bermeshev MV. Selective  
202 Hydrogenation of 5-Vinyl-2-Norbornene to 2-Vinylnorbornane. *Pet. Chem.* 2018,  
203 58 (12): 1056-1063.
- 204 6. Van Dyk TK, Majarian WR, Konstantinov KB, Young RM, Dhurjati PD,  
205 LaRossa EA. Rapid and sensitive pollutant detection by induction of heat-  
206 shock gene – bioluminescence gene fusion. *Appl. Environ. Microbiol.* 1994, 60:  
207 1414-1420.
- 208 7. Van Dyk T, Rosson RA, LaRossa EA. *Photobacterium luminescens luxCDABE*  
209 promoter probe vectors. *Methods in Molecular Biology.* 1998, 102: 85-95.
- 210 8. Kotova VY; Manukhov IV; Zavilgelskii GB. Lux-Biosensors for Detection of  
211 SOS-Response, Heat Shock and Oxidative Stress. *Biotechnology in Russia.* 2009,  
212 6:16-25.
- 213 9. Manukhov IV; Kotova VY; Mal'dov DG; Il'ichev AV; Bel'kov AP; Zavil'gel'skii.  
214 GB Induction of oxidative stress and SOS response in *Escherichia coli* by  
215 vegetable extracts: the role of hydroperoxides and the synergistic effect of  
216 simultaneous treatment with cisplatin. *Microbiology* 2008, 77(5): 523-529.
- 217 10. Melkina OE, Goryanin II, Bazhenov SV, Manukhov IV, Zavilgelsky GB..  
218 Comparative analysis of *Aliivibrio logei luxR1* and *luxR2* genes regulation in  
219 *Escherichia coli* cells. *Arch Microbiol.* 2019, doi: 10.1007/s00203-019-01691-3.
- 220 11. Vasilchenko AS, Vasilchenko AV, Pashkova TM, Smirnova MP, Kolodkin NI,  
221 Manukhov IV, Zavilgelsky GB, Sizova EA, Kartashova OL, Simbirtsev AS,  
222 Rogozhin EA, Duskaev GK, Sycheva MV. Antimicrobial activity of the  
223 indolicidin-derived novel synthetic peptide In-58. *J Pept Sci.* 2017;23(12):855-  
224 863. doi: 10.1002/psc.3049.
- 225 12. Gnuchikh E, Baranova A, Schukina V, Khaliullin I, Zavilgelsky G, Manukhov I.  
226 Kinetics of the thermal inactivation and the refolding of bacterial luciferases in  
227 *Bacillus subtilis* and in *Escherichia coli* differ. *PLoS One.* 2019; 14(12):  
228 doi:10.1371/journal.pone.0226576.
- 229 13. . Zavilgelsky GB, Kotova VYu, Manukhov IV. Action of asymmetric 1,1-  
230 dimethylhydrazine on bacterial cells is determined by hydrogen peroxide.  
231 *Mutation Research.* 2007 ;634(1-2):172-6.
- 232 14. Goryanin II; Kotova VY; Krasnopeevea ED; Chubukov PA; Balabanov VP;  
233 Chalkin SF; Shatrov TY; Zavilgelsky GB; Manukhov IV. Genotoxic action of the  
234 1,1-dimethylhydrazine determined by alkylating compounds appearing in the

- 235 result of oxidation and hydrogen peroxide. Trudy Moskovskogo fiziko-  
236 tekhnicheskogo institute. 2013, 5(1):103-111.
- 237 15. Zavilgelsky GB; Zarubina, AP; Manukhov IV. Sequencing and comparative  
238 analysis of the lux operon of *Photorhabdus luminescens* strain Zm1: ERIC  
239 elements as putative recombination hot spots. Mol Biol . 2002, 36(5):637-647.
- 240 16. Bell A; Langsdorf L; Burtovyy O. Cycloalkylnorbornene monomers, polymers  
241 suitable for use as pervaporation membrane films. Patent USA. WO 2014025735  
242 , 2014.
- 243 17. Zheng M, Wang X, Templeton LJ, Smulski DR, LaRossa RA, Storz G. DNA  
244 microarray-mediated transcriptional profiling of the Escherichia coli response to  
245 hydrogen peroxide. J. Bacteriol. 2001, 183: 4562-4570.
- 246 18. Kessenikh AG, Manukhov IV, Vagapova ER, Vysokikh MYu, Konopleva MN,  
247 Kotova VYu, Gorbunov MA, Chalkin SF, Zavilgelsky GB. A set of lux  
248 biosensors for the detection of toxic products of incomplete oxidation of  
249 asymmetric dimethylhydrazine in a medium. 2015, patent of Russia No. 2626569.
- 250 19. Manukhov IV, Gorbunov MA, Degtev DI, Zavilgelsky GB, Kessenikh AG,  
251 Konopleva MN, Kotova VYu, Krasnopeeve ED, Motovilov KA, Osetrova MS,  
252 Chalkin SF, Shatrov TYa. A set of lux biosensors for determining the genotoxic  
253 products of incomplete oxidation of asymmetric dimethylhydrazine in a medium.  
254 2014, patent of Russia №2569156.
- 255 20. Manukhov IV, Balabanov VP, Kotova VYu, Khrulnova SA, Melkina OE,  
256 Kraynov AA, Pustovoit KS, Krechetov PP, Koroleva TV, Shatrov TYa, Chalkin  
257 SF, Zavilgelsky GB. Use of Lux biosensors for detection of UDMH in soil. Dual  
258 technology (in Russian). 2008, 44(3): 50-56.
- 259 21. Kessenich AG, Manukhov IV, Yaguzhinsky LS, Bermeshev MV, Zisman MA,  
260 Pevgov VG, Samoilov VO, Shorunov SV, Maksimov AL. Toxic effect of 2-ethyl  
261 compound (bicyclo [2.2.1] heptane) on bacterial cells. Biotechnology in Russia.  
262 2019, 35 (6): 67-72.
- 263 22. Sazykin I, Makarenko M, Khmelevtsova L, Seliverstova E, Rakin A, Sazykina M.  
264 Cyclohexane, naphthalene, and diesel fuel increase oxidative stress, CYP153,  
265 *sodA*, and *recA* gene expression in *Rhodococcus erythropolis*. Microbiologyopen.  
266 2019, 8(9):e00855. doi: 10.1002/mbo3.855.
- 267 23. Dóbe S, Turányi T, Bérces T, Márta F. The kinetics of hydroxyl radical reactions  
268 with cyclopropane and cyclobutane. Proceedings of the Indian Academy of  
269 Sciences Chemical Sciences. 1991, 103 (3):499–503.



- 270 24. Sirjean B, Glaude PA, Ruiz-Lopez MF, Fournet R. Detailed Kinetic Study of the  
271 Ring Opening of Cycloalkanes by CBS-QB3 Calculations. *The Journal of*  
272 *Physical Chemistry*. 2006, 110 (46): 12693-12704 DOI: 10.1021/jp0651081.  
273 25. Quillardet P, Hofnung M. The SOS chromotest: a review. *Mutat Res*. 1993;  
274 297(3):235-79.  
275 26. Ames BN, McCann J, Yamasaki E. Methods for detecting carcinogens and  
276 mutagens with the *Salmonella*/mammalian-microsome mutagenicity test.  
277 *Mutation Res*. 1975, 31:347-364.  
278 27. Maron DM, Ames BN. Revised methods for the *Salmonella* mutagenicity test.  
279 *Mutation Res*. 1983, 113: 173-215.  
280 28. Igonina EV, Marsova MV, Abilev SK. Lux-biosensors: screening biologically  
281 active compounds for genotoxicity. *Ecological genetics*. 2016, 14(4):52-62.  
282 29. Rapoport IA. Mechanism of the mutagenic effect of N-nitroso compounds and  
283 principle of the direct action of mutagens. *Dokl Akad Nauk SSSR*. 1969,  
284 189(2):407-10.

285

## 286 **FIGURE LEGENDS**

287 Figure 1. Structure of 2,2'-bis(bicyclo[2.2.1]heptane) molecule [3, 4].

288

289 Figure 2. Luminescence of *E. coli* MG1655 pAlkA-lux cells after BBH addition depending on  
290 incubation time.

291 k-control cells without toxicant addition

292 mms - added MMS to final concentration of 100  $\mu$ M

293 BBH-1-added BBH to final concentration of 100 g/l,

294 BBH-2 – 10 g/l,

295 BBH-3 – 1 g/l

296

297 Figure 3. Luminescence of *E. coli* MG1655 pOxyR-lux cells after BBH addition depending on  
298 incubation time.

299 k - control cells of *E. coli* MG1655 pOxyR-lux without toxicant addition

300 HP - added hydrogen peroxide to a final concentration of 1 mM.

301 BBH-1-added BBH to final concentration of 100 g/l,

302 BBH -2-10 g/l,

303 BBH -3 – 1 g/l

304

305 Figure 4. Luminescence of *E. coli* MG1655 pColD-lux cells after BBH addition depending on  
306 incubation time.

307 k-*E. coli* MG1655 pColD-lux control cells without toxicant addition

308 mit c - added mitomycin C to the final concentration of 10  $\mu$ M.

309 BBH-1 - added BBH to final concentration of 100 g/l,  
 310 BBH-2 - 10 g/l,  
 311 BBH-3 – 1 g/l  
 312

313 Figure 5. Luminescence of *E. coli* MG1655 pSoxS-lux cells after BBH addition depending on  
 314 incubation time.

315 k - control cells of *E. coli* MG1655 pSoxS-lux without toxicant addition

316 HP - added hydrogen peroxide to a final concentration of 1 mM.

317 BBH-1 - added BBH to final concentration of 100 g/l,

318 BBH-2 - 10 g/l,

319 BBH-3 – 1 g/l  
 320

321

322 **Table 1.** Threshold concentrations for lux biosensors.

| Biosensor | UDMH*<br>M/l      | BBH,<br>M/l       | Standard toxicant,<br>M/l                            | Note                                                                                                           |
|-----------|-------------------|-------------------|------------------------------------------------------|----------------------------------------------------------------------------------------------------------------|
| pAlkA-lux | $2 \cdot 10^{-5}$ | nd**              | MNNG,<br>$10^{-8}$                                   | Alkylation of DNA.                                                                                             |
| pOxyS-lux | $3 \cdot 10^{-6}$ | $10^{-2}$         | H <sub>2</sub> O <sub>2</sub> ,<br>$2 \cdot 10^{-7}$ | Oxidation by hydrogen peroxide                                                                                 |
| pColD-lux | $8 \cdot 10^{-6}$ | $7 \cdot 10^{-3}$ | Mitomycin C,<br>$10^{-9}$                            | DNA damages which are leads to the formation of single-stranded sections of DNA in the cell..                  |
| pSoxS-lux | $2 \cdot 10^{-4}$ | $3 \cdot 10^{-3}$ | paraquat,<br>$10^{-7}$                               | Oxidation by superoxide anion radicals.                                                                        |
| pXen7     | $2 \cdot 10^{-3}$ | $4 \cdot 10^{-2}$ | C <sub>2</sub> H <sub>5</sub> OH,<br>$10^{-2}$       | Total toxicity is measured by the incidence of luminescence, which correlates with the number of living cells. |

323 \* The values of threshold concentrations for UDMH and standard toxicants which were  
 324 obtained by us earlier [18-20]

325 \*\* nd - not determined  
 326

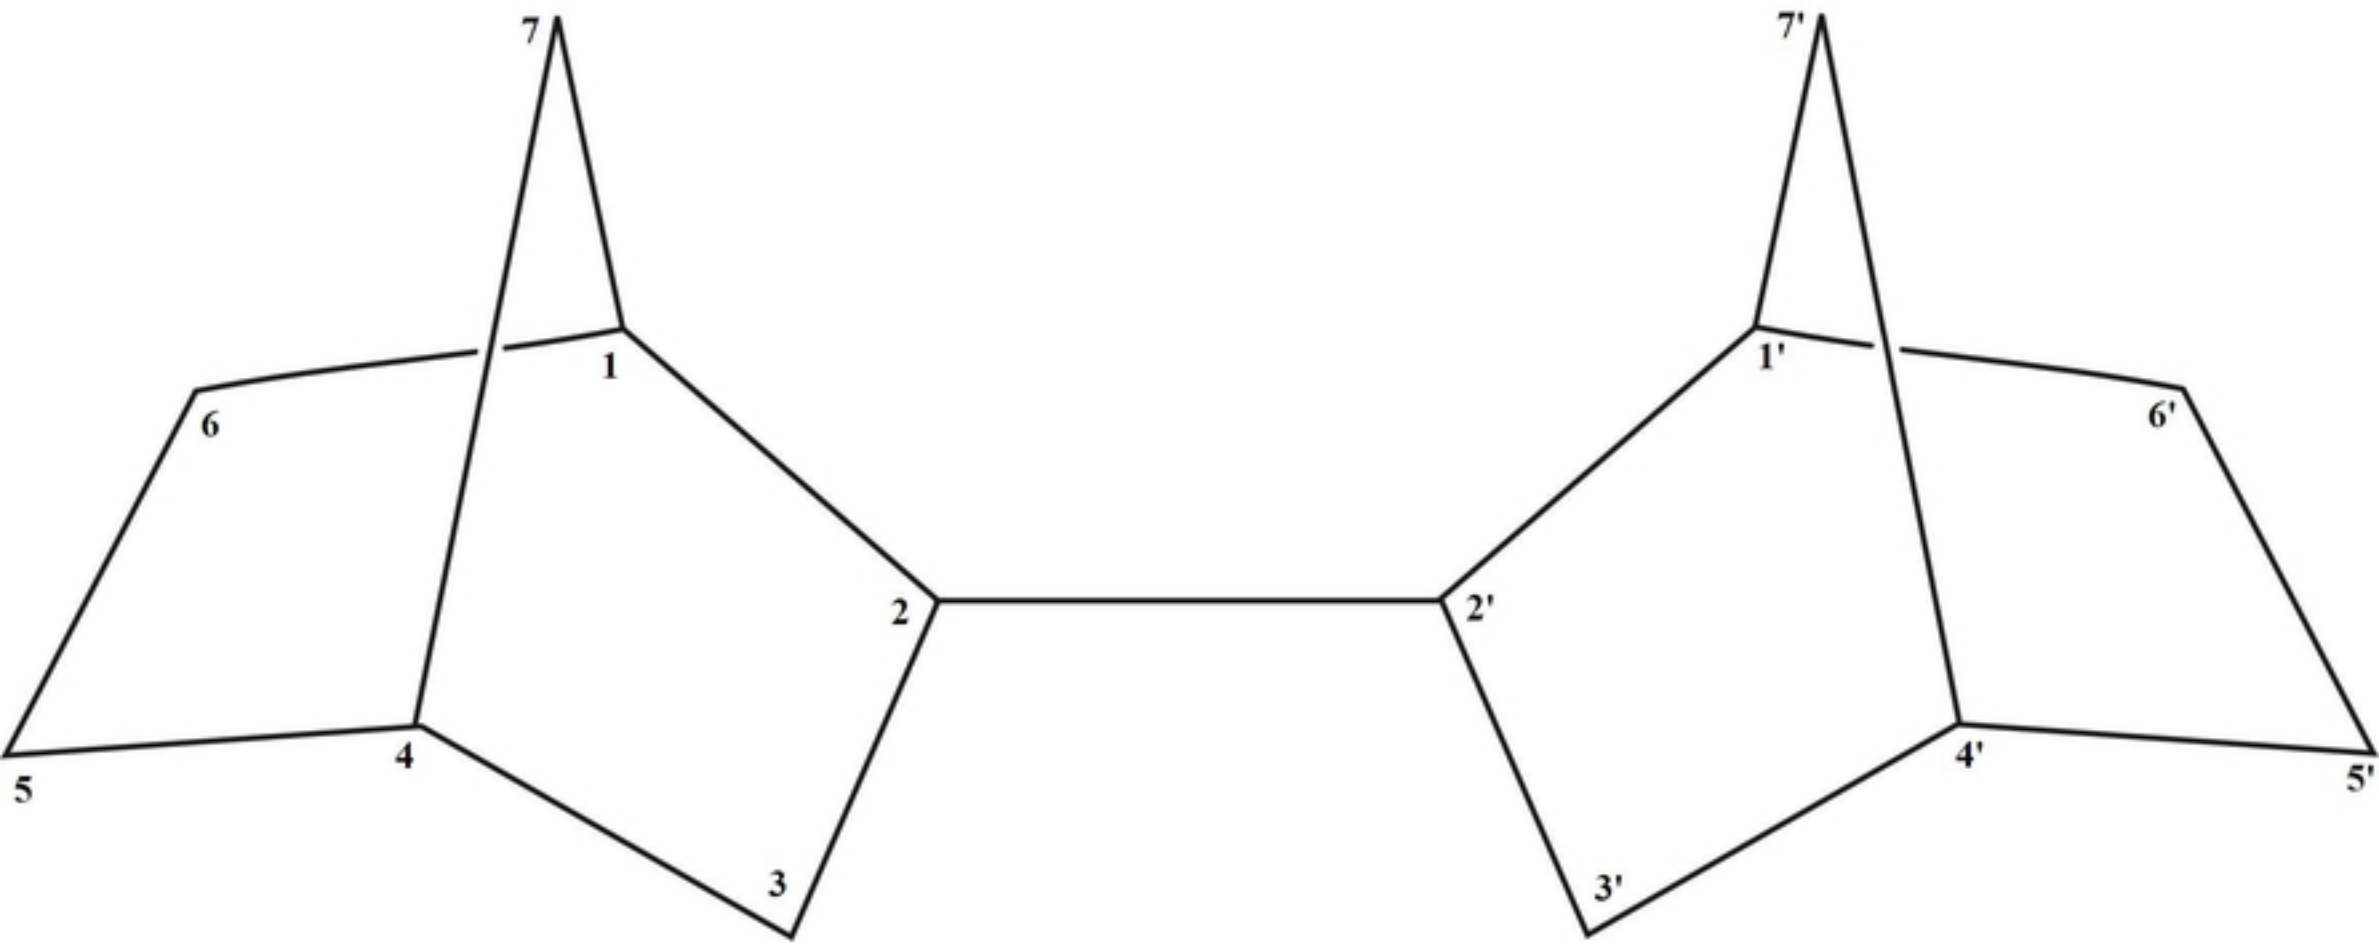

Figure 1

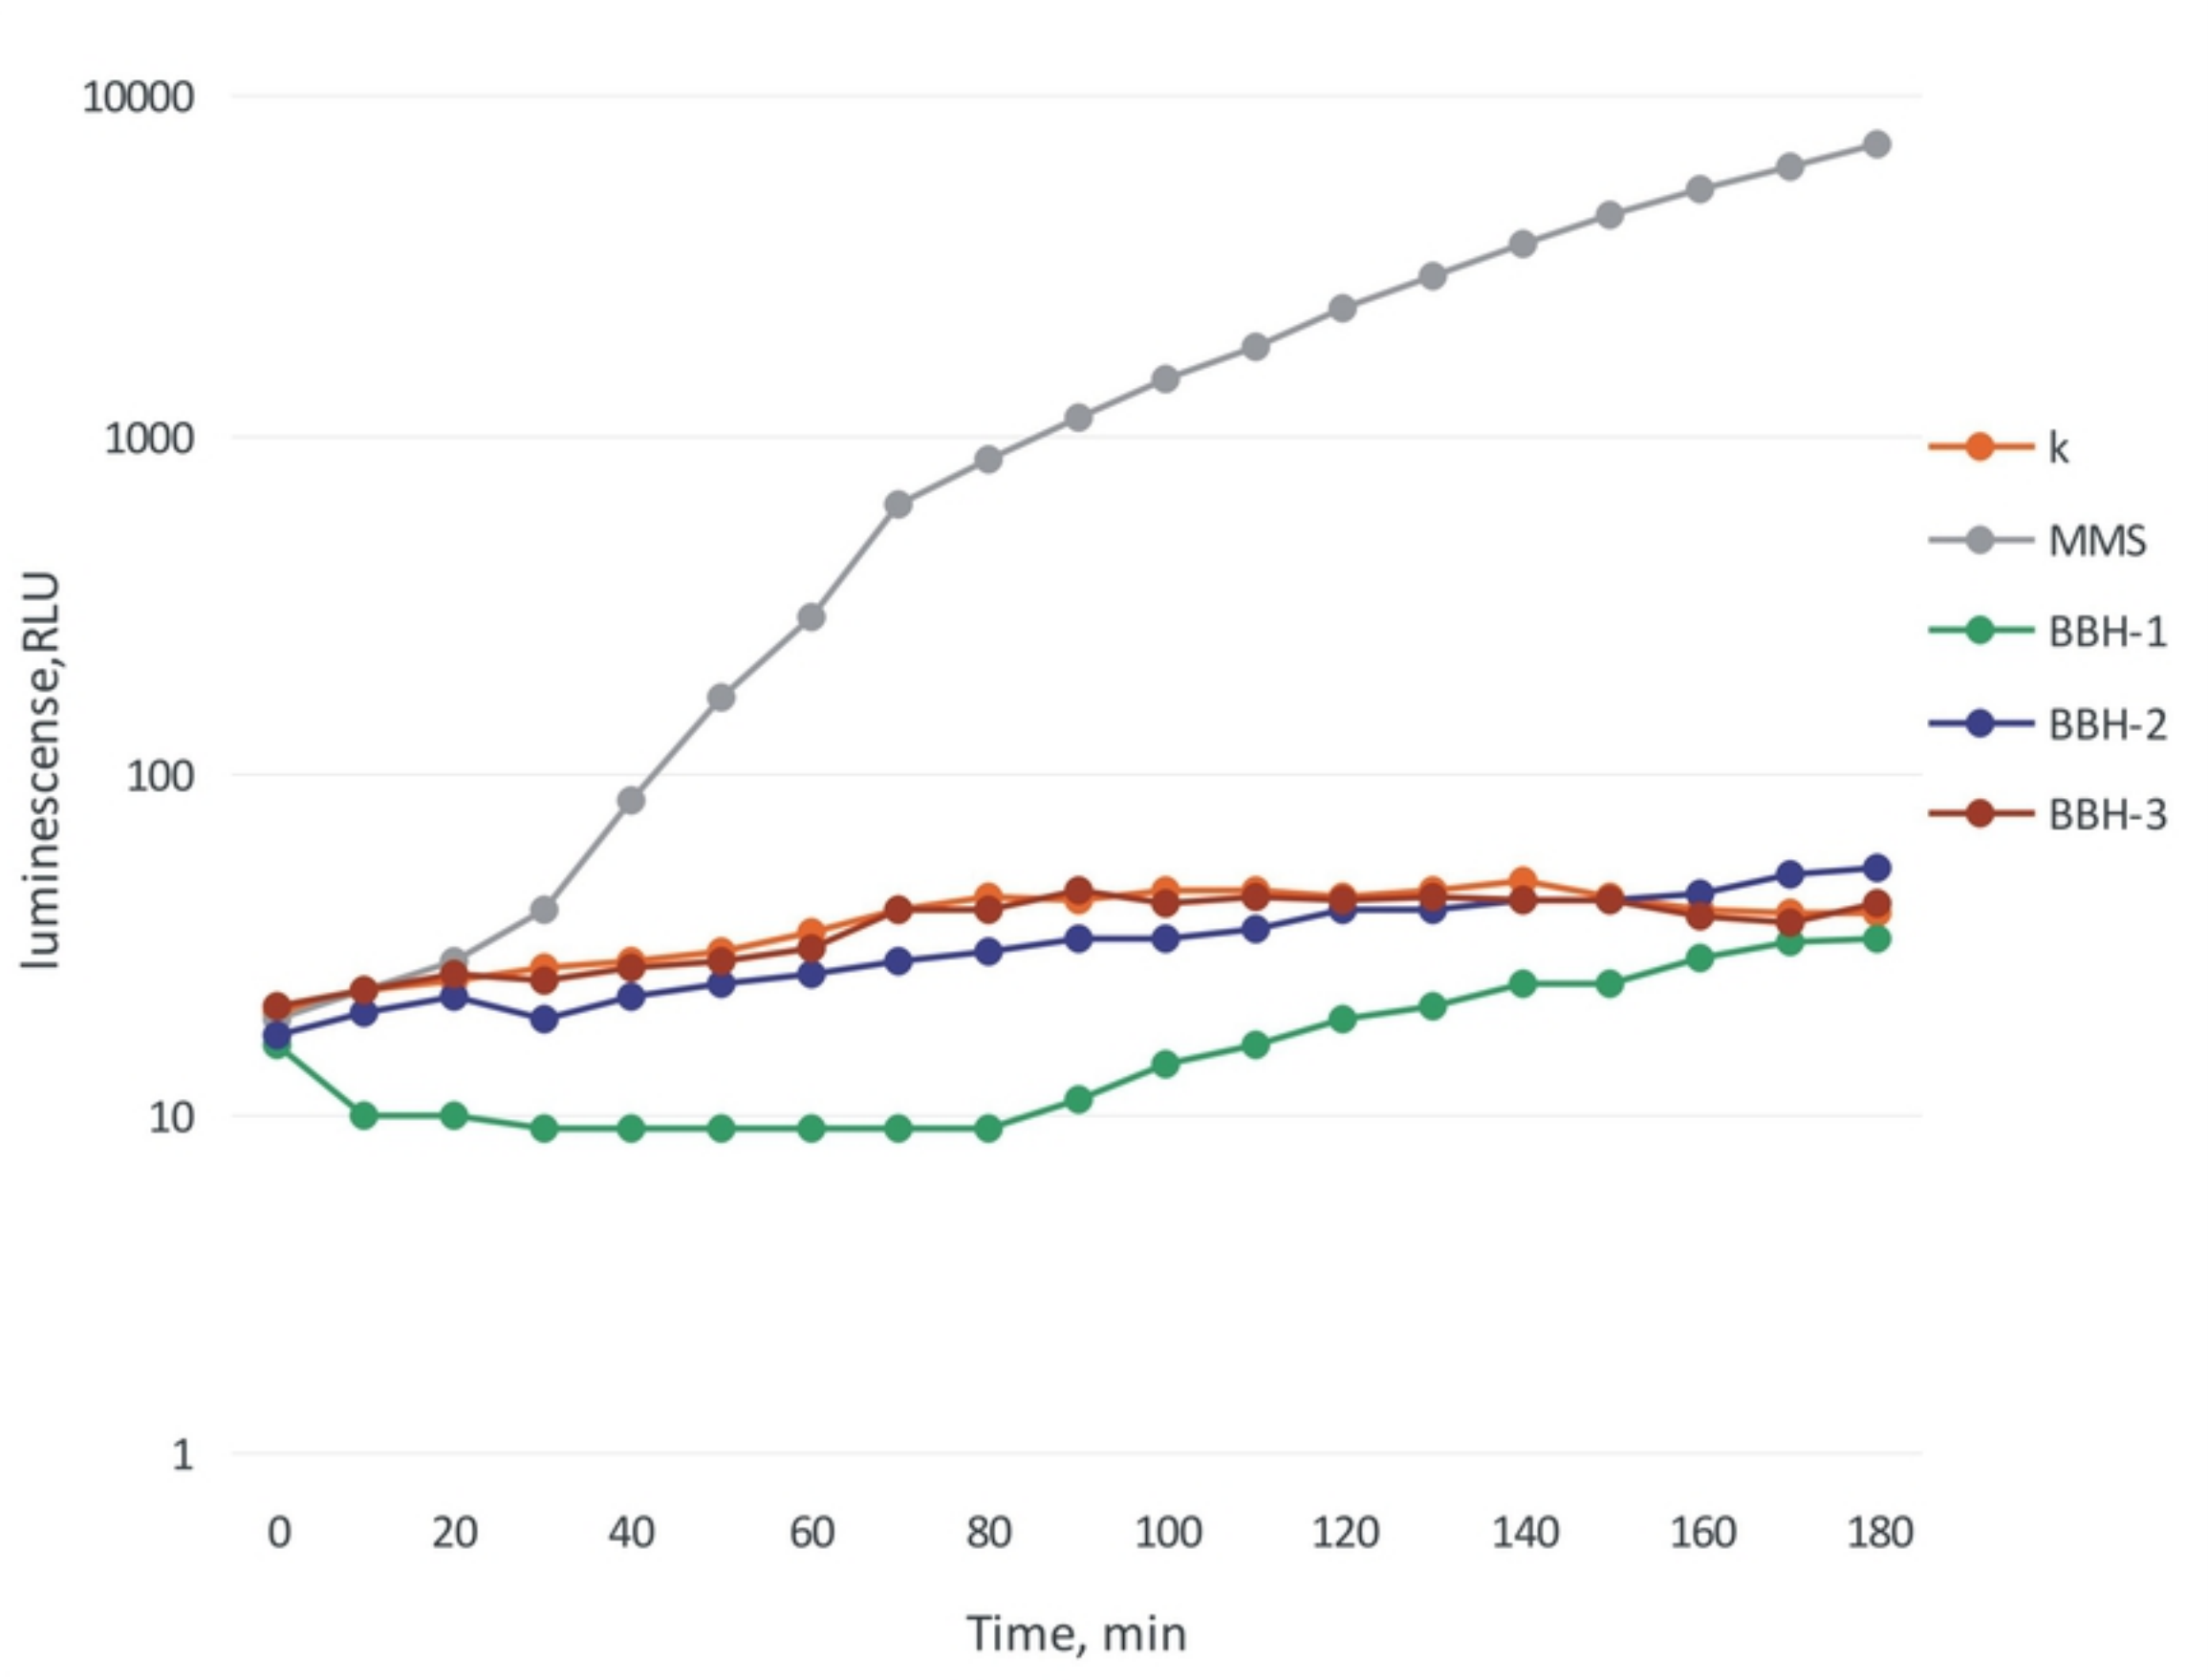

Figure 2

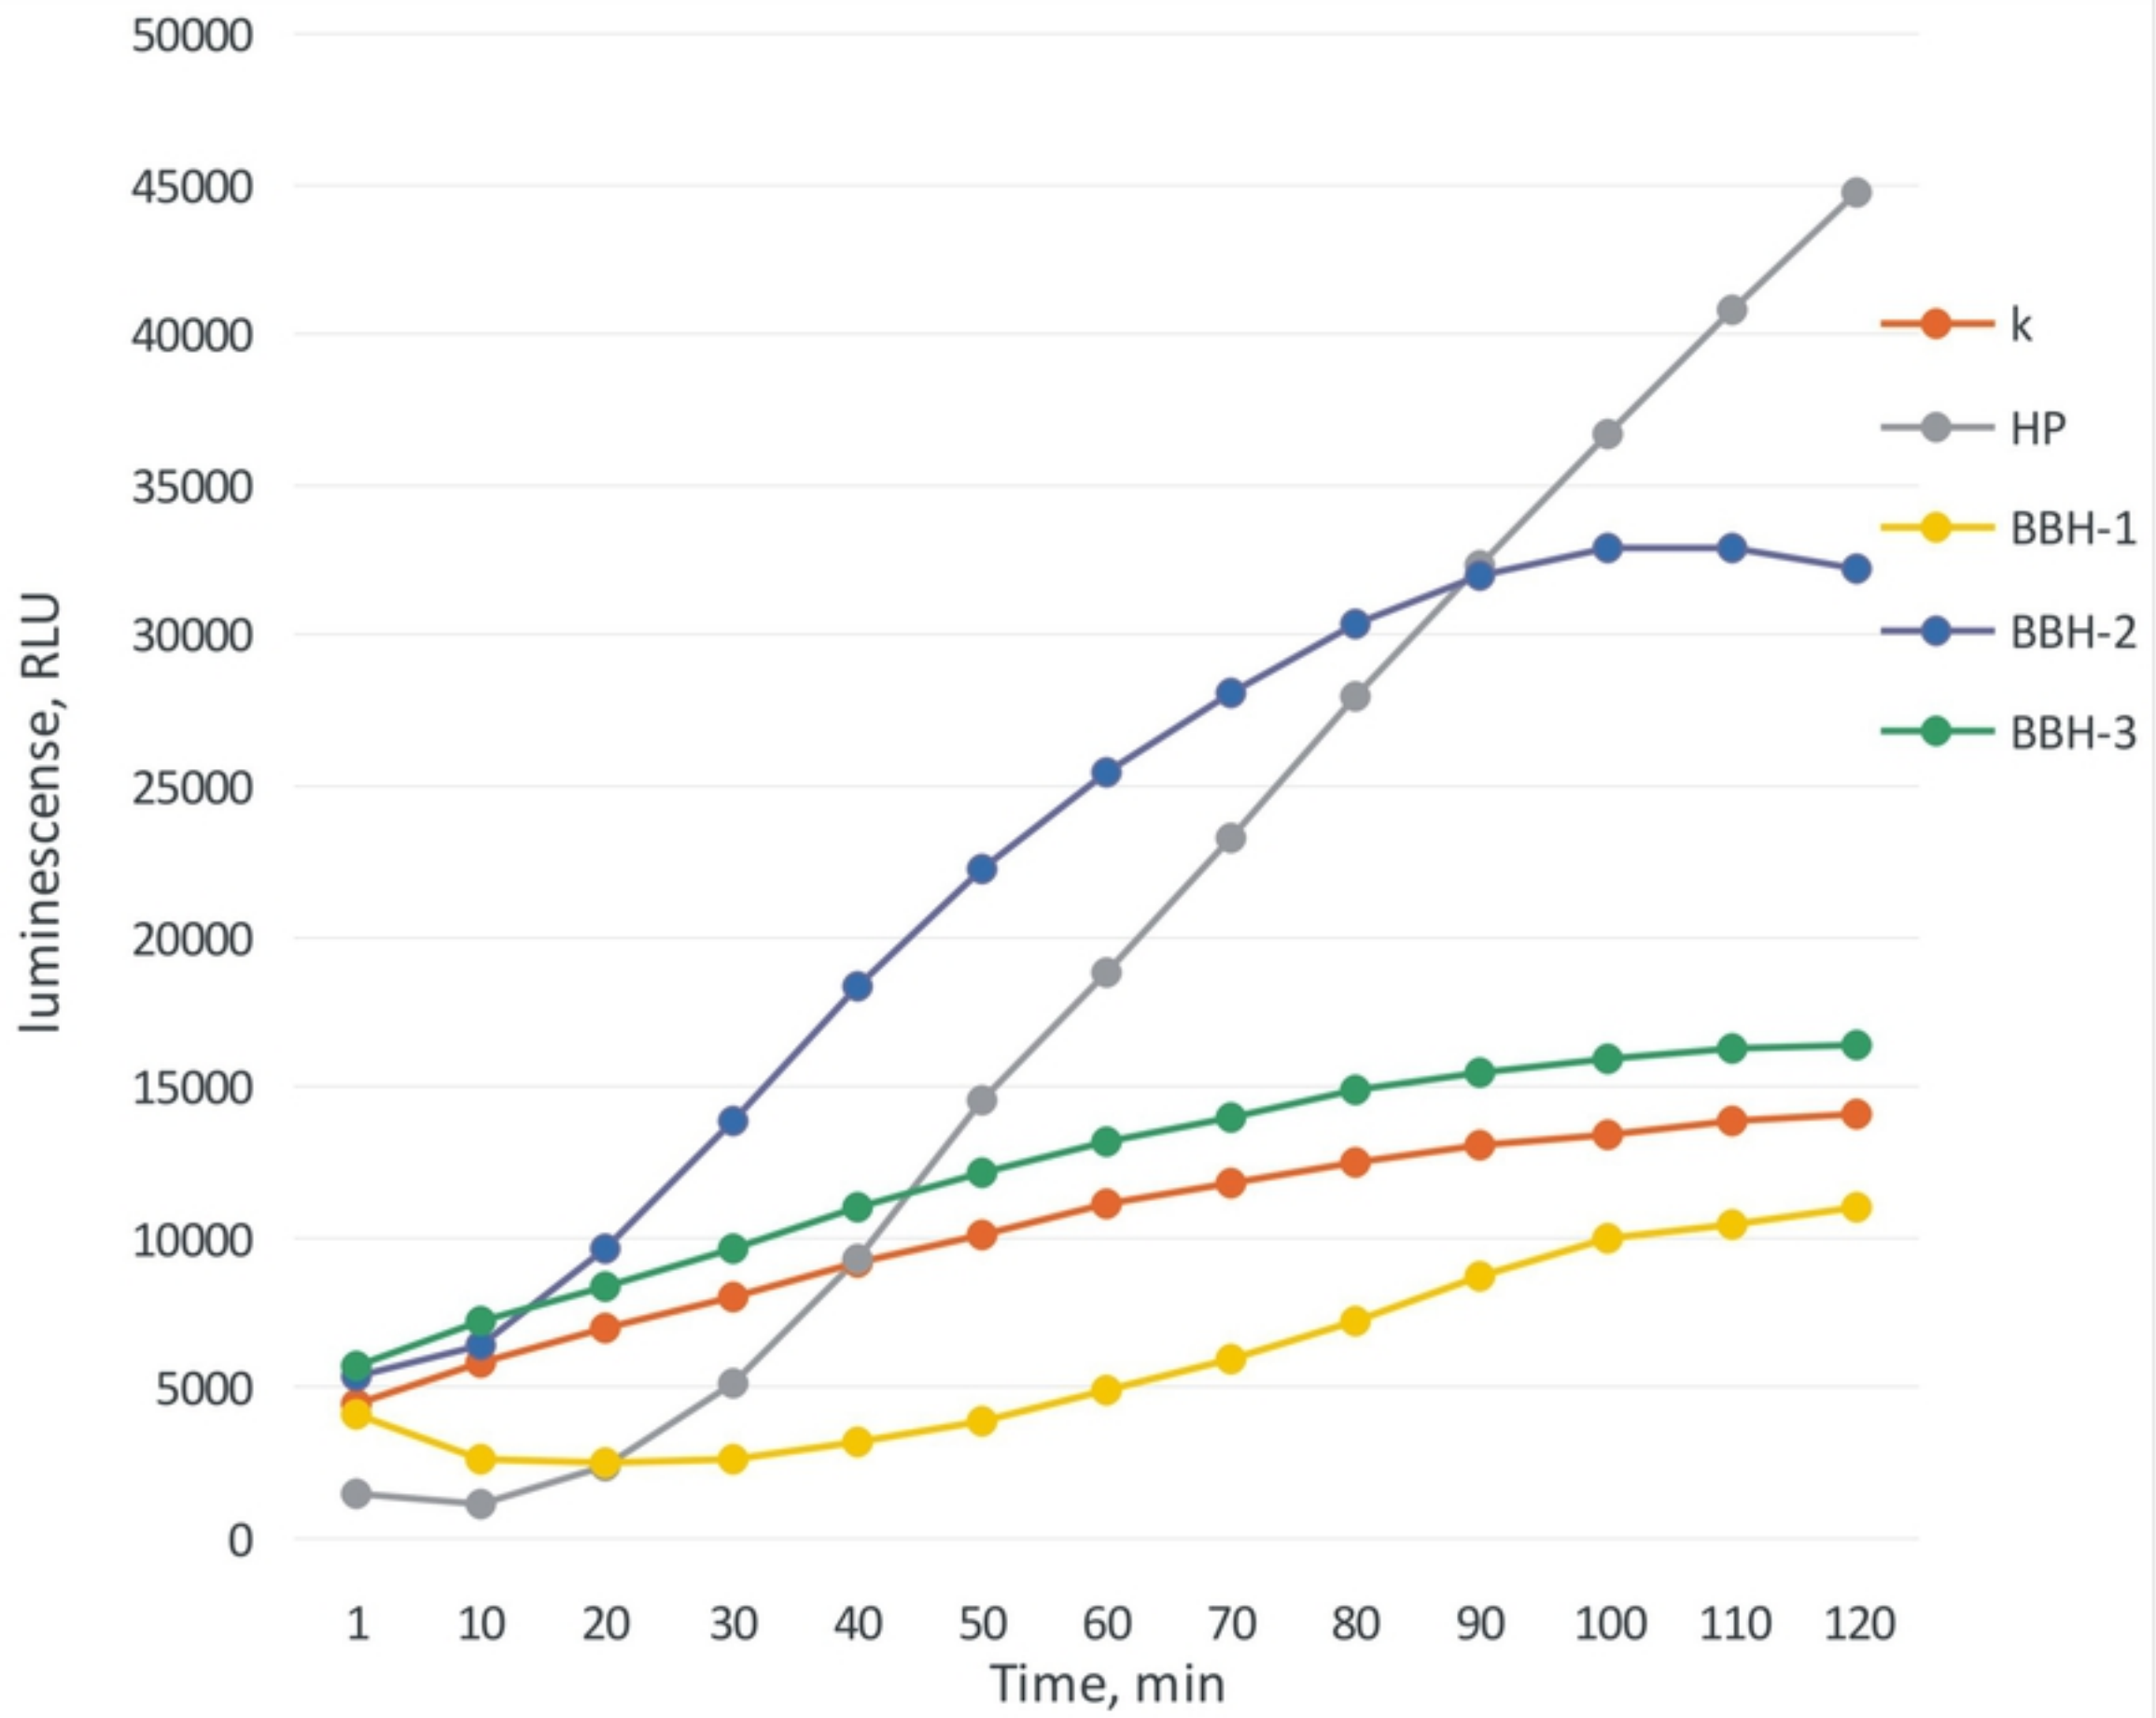

Figure 3

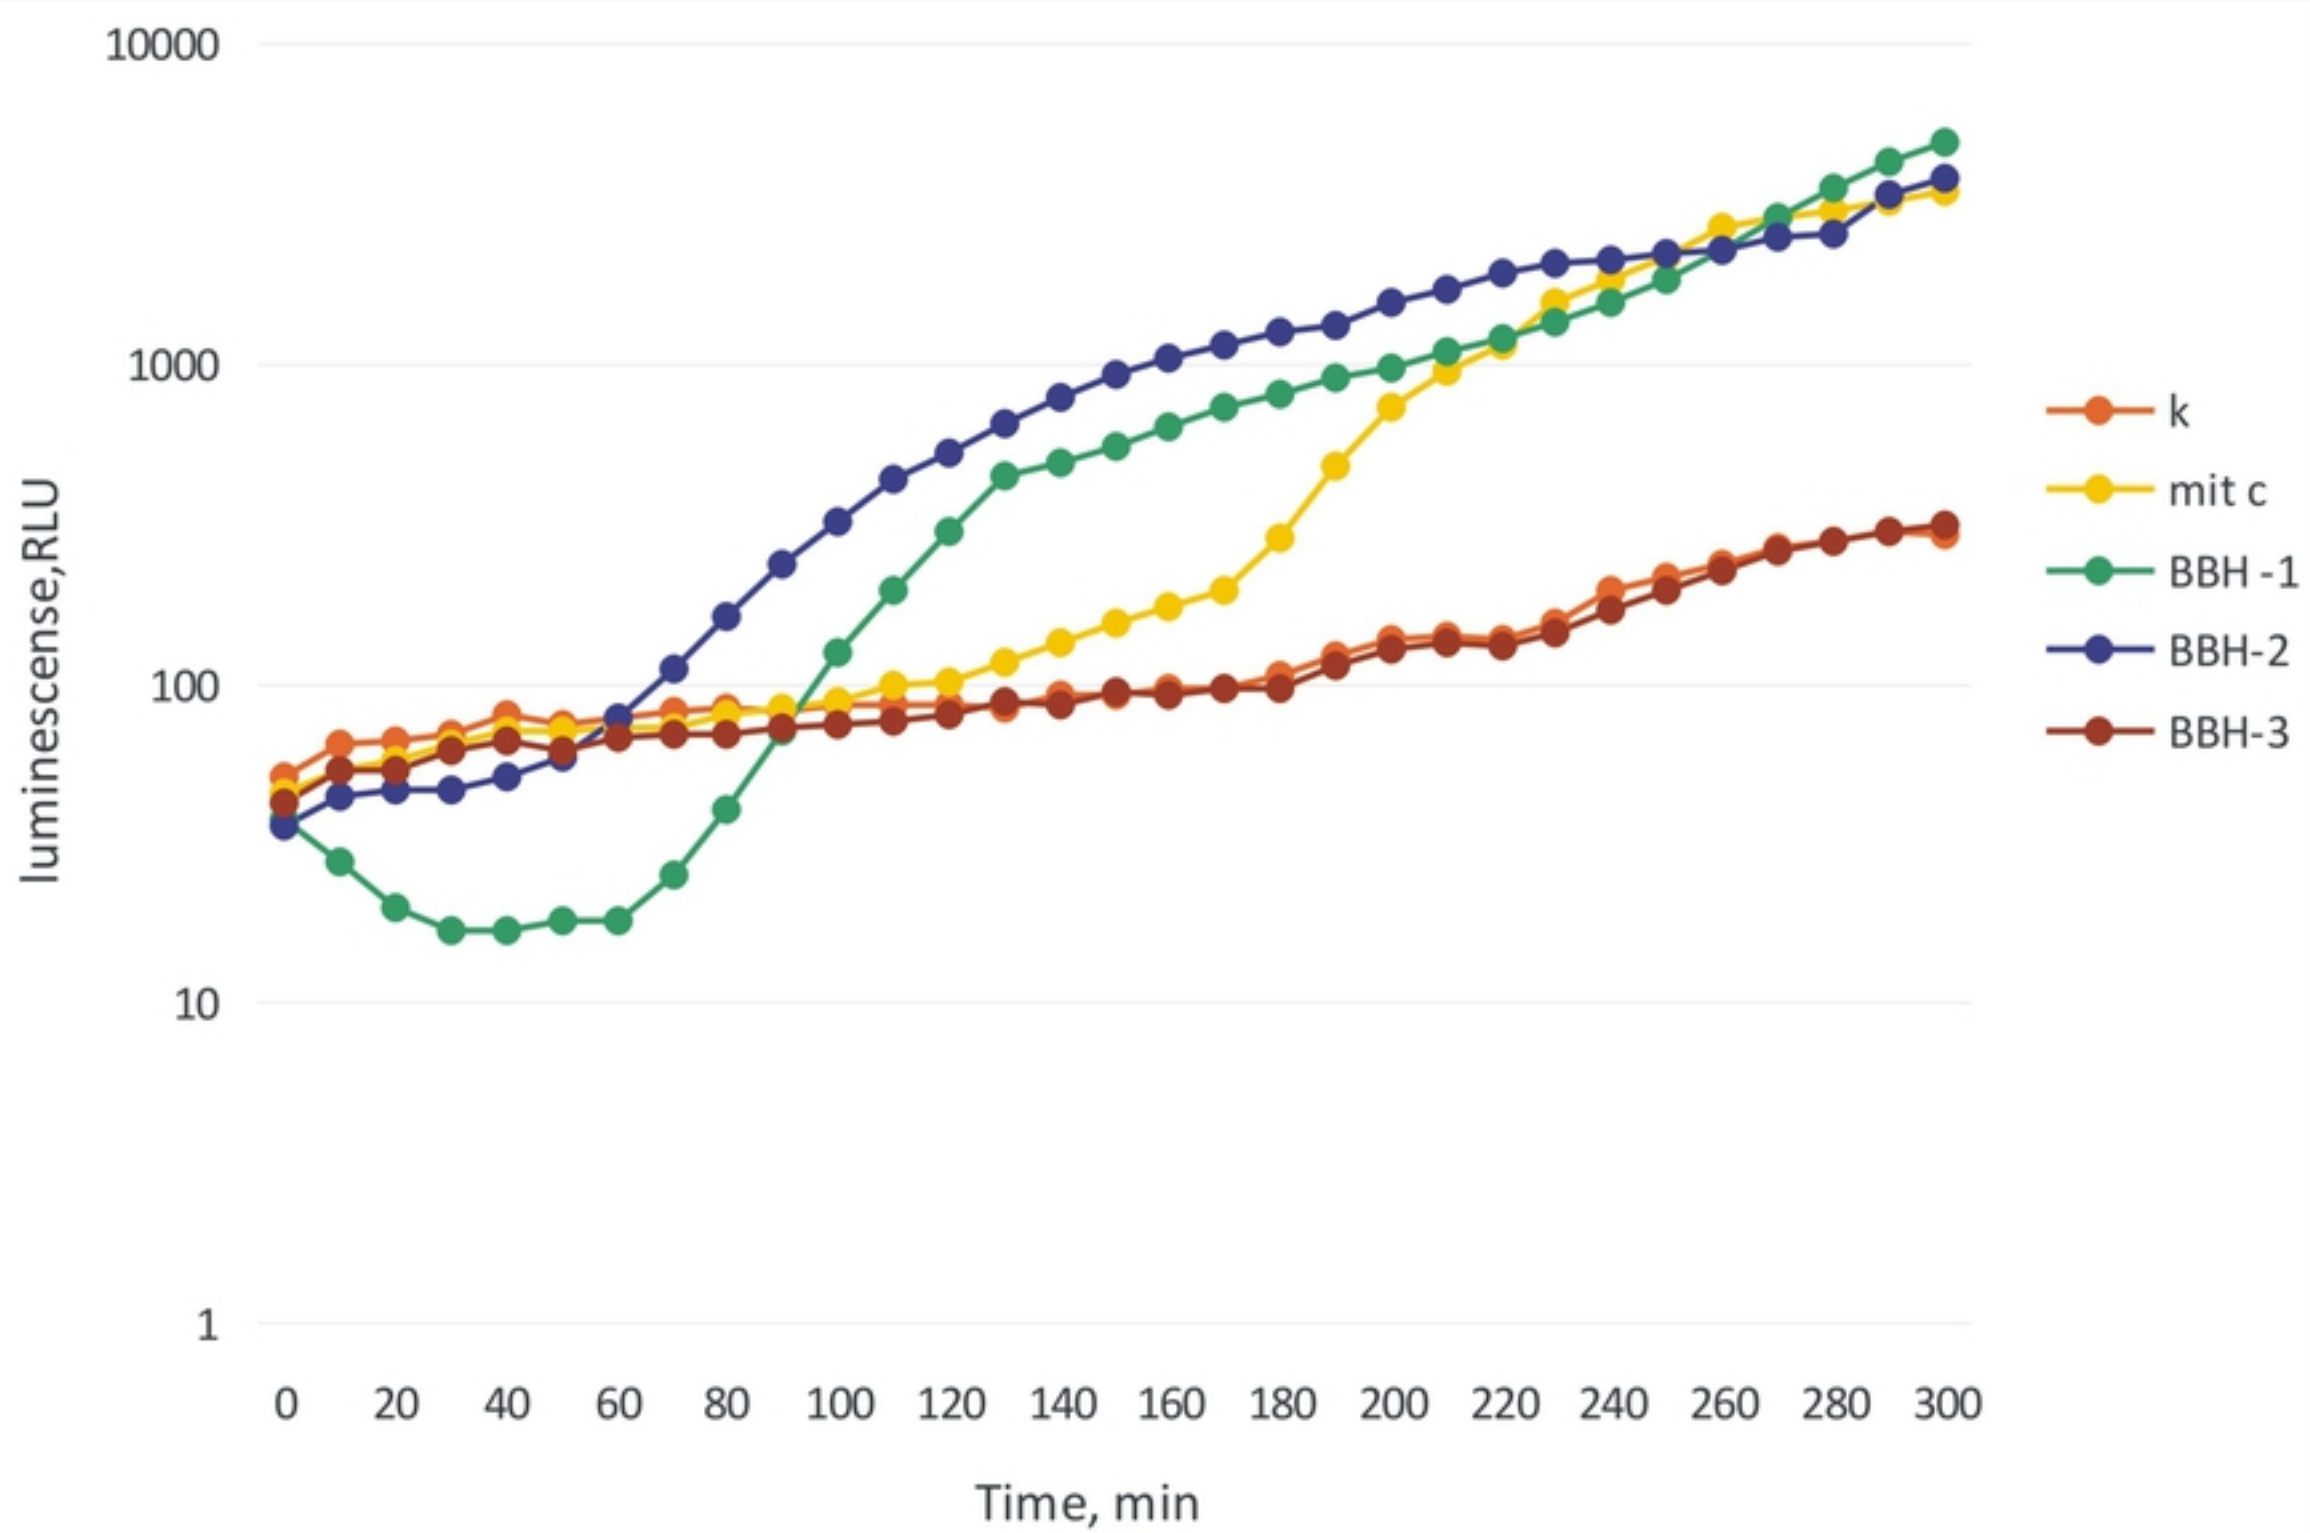

Figure 4



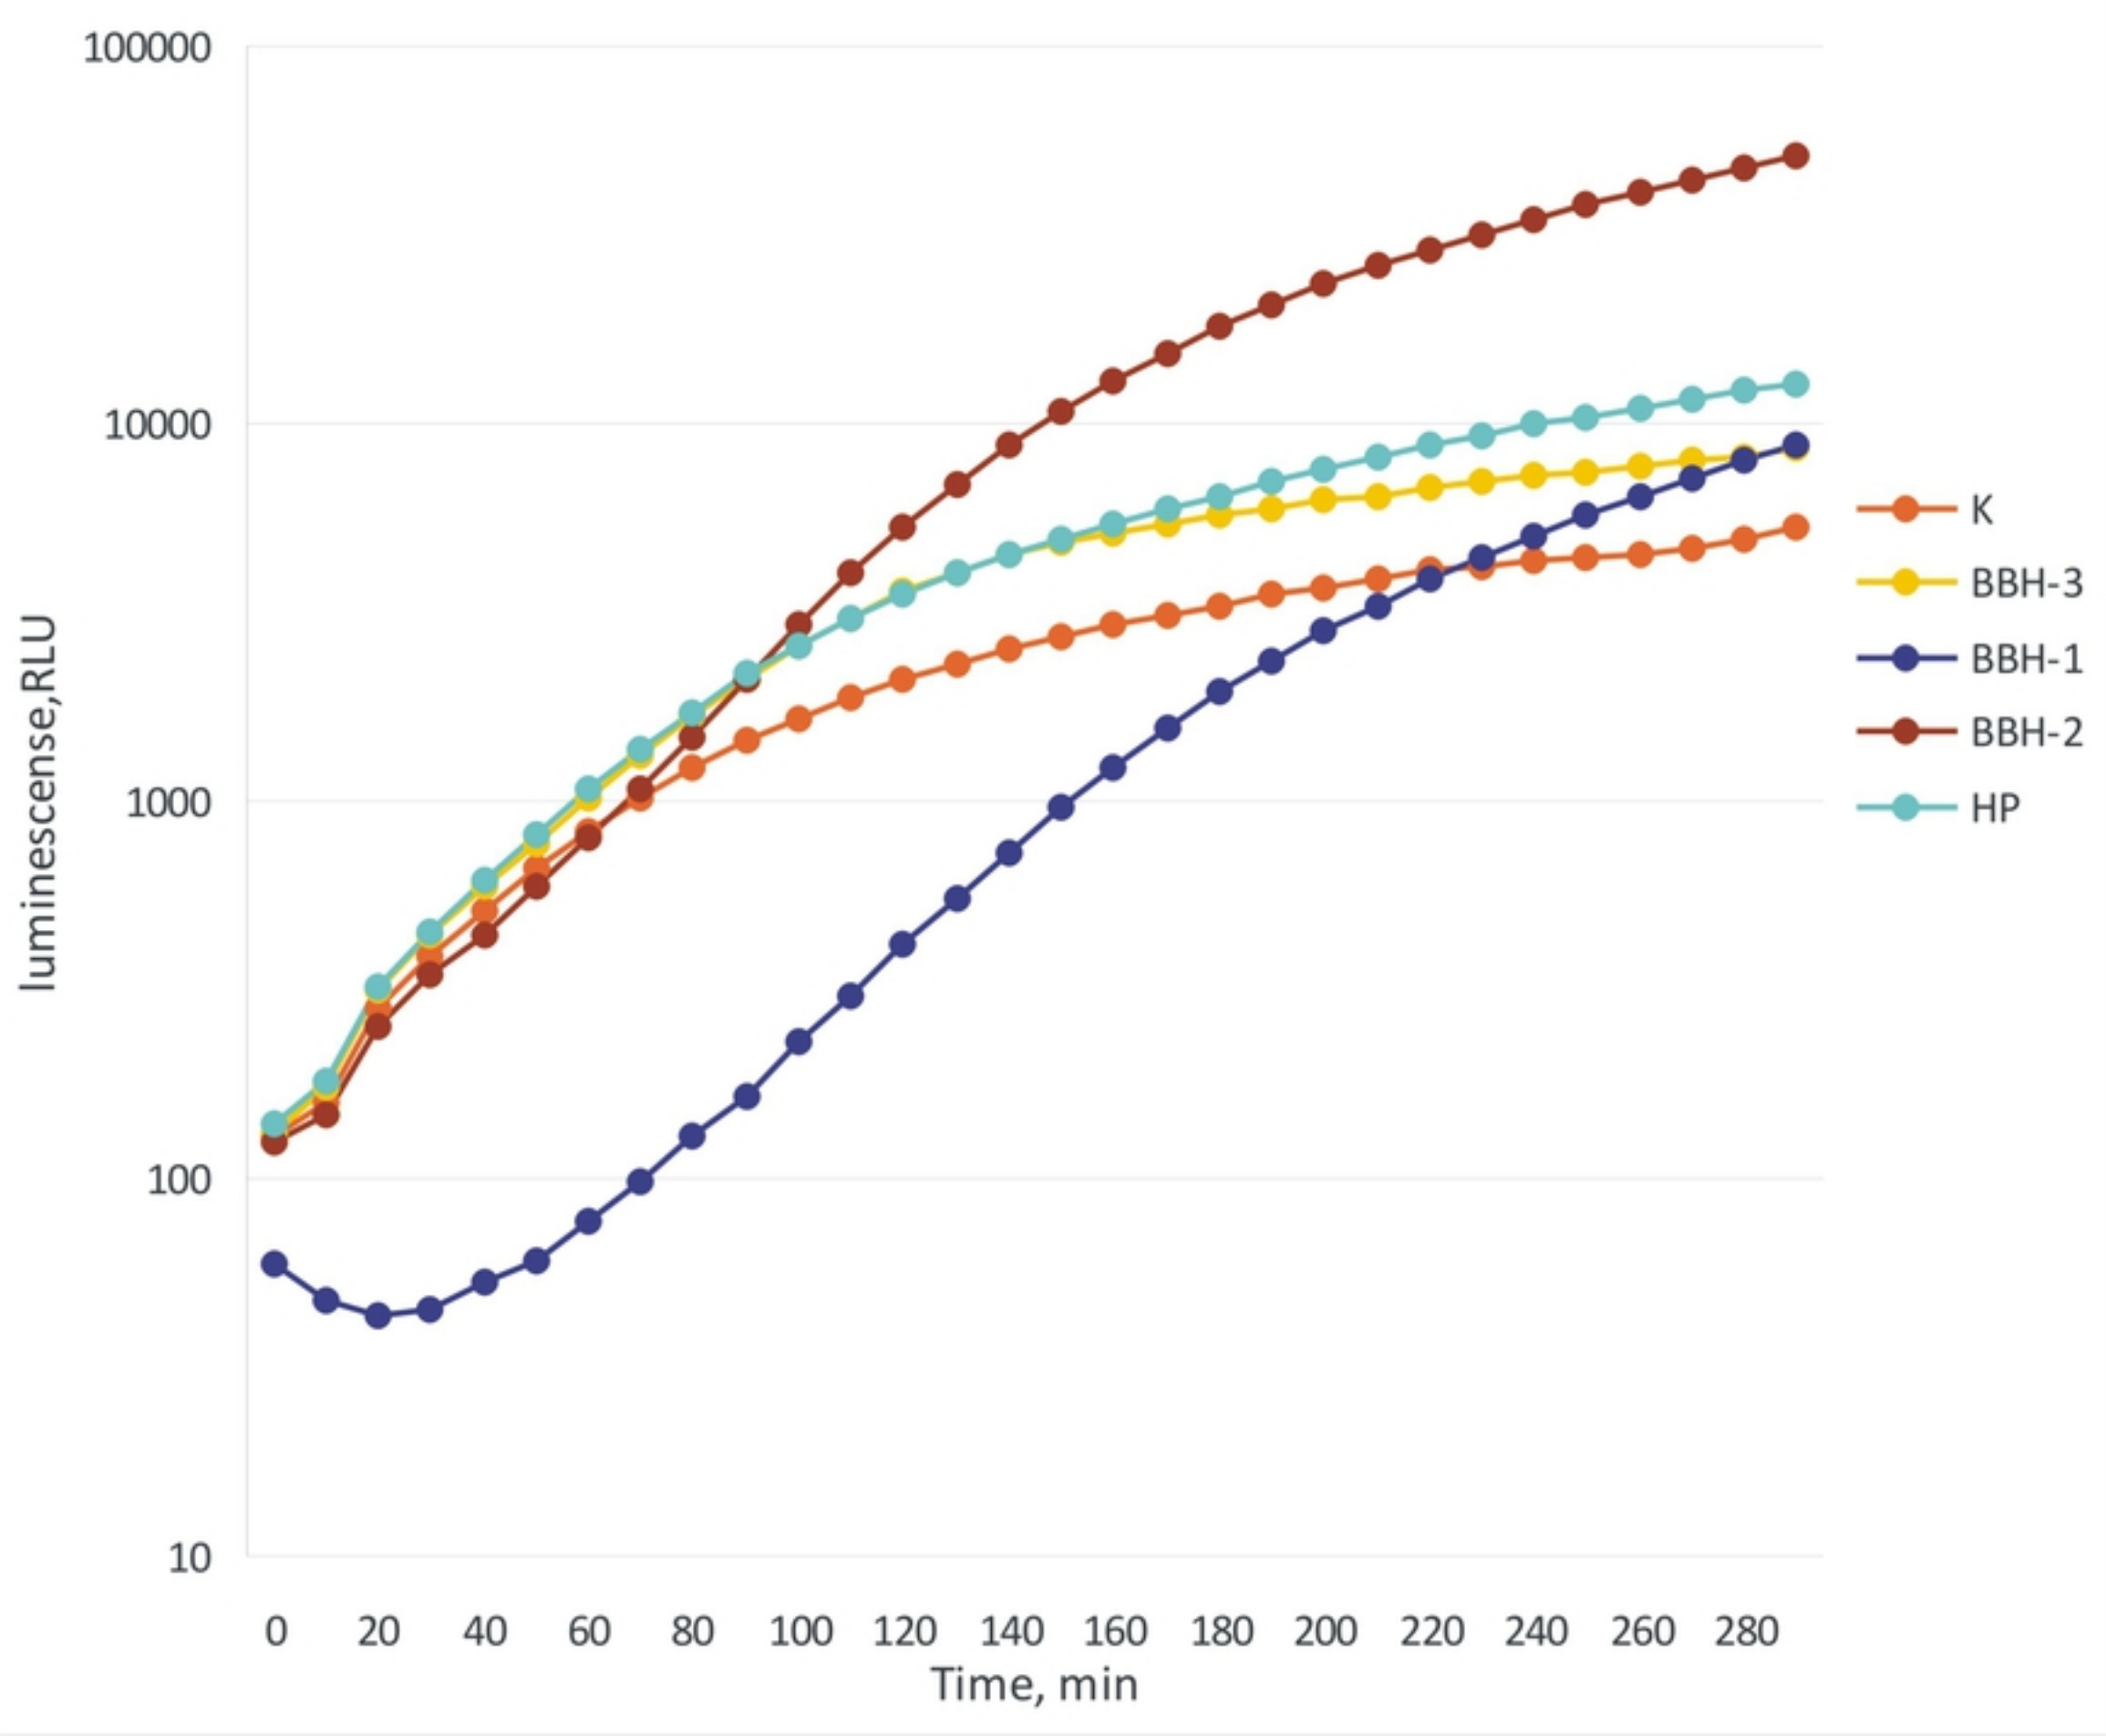

Figure 5
